# Supplementary material
Source: publisher figshare collection journal article supplement (https://gsapubs.figshare.com/articles/dataset/_/12534509)
Supplement: Supplementary file 1 [file 1]

# 1 **Regional variability in the frequency and magnitude of large**

## 2 **explosive volcanic eruptions**

3

4 Tom Sheldrake<sup>1</sup>, Luca Caricchi<sup>1</sup>5 <sup>1</sup>Department of Earth Sciences, University of Geneva, rue des Maraîchers 13, 1205

6 Geneva, Switzerland

7

8 **SUPPLEMENTARY MATERIAL**

9 Below is a summary of the assumptions, method and results for the (a) homogeneity  
 10 test and (b) change-point analysis; and detailed summary of the statistical methods  
 11 used for (c) the statistical model to estimate the frequency-Magnitude relationship,  
 12 and (d) calculation of the global recurrence rate of large-magnitude eruptions.

13

14 **(a) Chi-square test for homogeneity based on a contingency table**

15 A chi-square test for homogeneity is calculated using for the sum of M4 events and  
 16 sum of M5-M7 events, across different values of  $t_{\text{unique}}$ . The rationale for reducing the  
 17 homogeneity test to two populations is that it reduces the degrees of freedom by half  
 18 so the test statistic is more informative. The number of M4 events is chosen as a  
 19 population by itself as it represents the largest variation in the record. When  $X^2 < df$   
 20 the hypothesis of homogeneous populations for different values of  $t_{\text{unique}}$  is accepted.

21

22 Results:

| <b>tstart</b> | <b>X<sup>2</sup></b> | <b>df</b> | <b>pvalue</b> |
|---------------|----------------------|-----------|---------------|
| 50 ka         | 1060.2               | 500       | 2.2e-16       |

## 23 **(b) Change-point analysis of Magnitude 4 events in the Holocene dataset**

24 A change point for the number of magnitude 4 events is calculated using the  
 25 segmented package in R<sup>1</sup>, which uses a dummy variable to identify a change point in  
 26 a linear regression by maximum likelihood fitting.

27

28 <sup>1</sup>(<https://cran.r-project.org/web/packages/segmented/segmented.pdf>)

29

## 30 **(c) Hierarchical Bayesian Analysis**

31 To statistically characterise the frequency-Magnitude (f-M) relationship for  
 32 volcanic eruptions we use the methodology set out in Sheldrake (2014), which is  
 33 based on analysing the proportion of different events. A hierarchical Bayesian  
 34 approach is employed, which quantifies the common distribution of eruptions for a  
 35 group of analogous volcanoes, whilst recognising that each volcano has a unique  
 36 record. Each of the individual eruptive records is considered exchangeable, and so  
 37 each volcano is assumed to be able to produce an eruption between M4 and M7. In  
 38 terms of magmatic processes, this assumption is akin to saying that there is a common  
 39 process determining the frequency of eruptions of various magnitudes globally, but at  
 40 an individual volcano this common process may only manifest in a particular sub-set  
 41 of the state space.

42 The statistical model has three hierarchies:

43 (a) Eruptive records, or data, which represent the likelihood of each eruption  
 44 magnitude ( $j$ ) at each volcano ( $i$ ), and is characterised as a multivariate dataset (i.e.  
 45 mutually exclusive events):

46 
$$x_{i,j} \sim \text{Multi}(\theta_{i,j}, n_j).$$

(b) Prior distribution, which characterises the common processes associated with the accumulation and eruption of eruptible magma that are responsible for the recurrence rate of volcanic eruptions. The prior is modelled using a Dirichlet distribution, as we characterise eruption magnitude as a continuous multivariate dataset where the probability of the different magnitudes ( $\theta_j$ ) adds to unity at each volcano. The Dirichlet distribution is parameterised by a series of alpha parameters ( $\alpha_j$ ), which is advantageous as it does not put any restrictions on the shape of the distribution, allowing different behaviours to be identified for different groups of volcanoes:

$$\theta_{i,j} \sim Dir(\alpha_j).$$

(c) Hyperprior distributions, which allow the prior distribution to be uninformative, and thus only determined by only the data in the model and not by subjective judgement. The hyperprior distributions ( $\phi_j, \psi$ ) are rearranged in terms of the alpha parameters of the Dirichlet distribution ( $\alpha_j$ ):

$$\alpha_j = \frac{\phi(\exp(\phi_j))}{J-1+\exp(\phi_j)},$$

where J is the total number of eruption scenarios (i.e. number of eruption magnitudes = 4). Each hyperprior is chosen so that the before observing the data each magnitude is equally likely.

The first hyperprior characterises the variability in the data between each of the volcanoes, and so is a distribution on  $\alpha_0$ , which is the sum of all the  $\alpha_j$  parameters:

$$\psi = \alpha_0 = \sum \alpha_j,$$

In the case where the model is uninformative each  $\alpha_j=1$  and so the minimum value of  $\alpha_0$  is the sum of these parameters (in the case here this is the number of Magnitude states = 4), and where the data is fully informative the value of  $\alpha_0$  is equal to the total number of eruptions or observations in the analysis (K, which in the case here is

71 1,766). Hence, the first hyperprior is parameterised as a uniform distribution between  
72 these two values:

73 
$$\psi \sim Unif(4, 1766).$$

74 The second hyperprior is a distribution of the logit of the mean probability for  
75 each magnitude multiplied by  $(J - 1)$ :

76 
$$\phi_j = \log\left(\frac{(K-1)\alpha_j}{\alpha_0 - \alpha_j}\right).$$

77 In the case where each magnitude is equally likely this will equal zero, and so the  
78 second hyperprior is parameterised as a diffuse distribution centred on zero:

79 
$$\phi_j \sim Normal(0, 1000).$$

80 There are two outputs of the statistical model, the prior and posterior  
81 distributions. The prior distribution is calculated based on a combination of the total  
82 number of events for each magnitude, the variation in the proportions of each  
83 magnitude at individual volcanoes, and the total number of events observed at each  
84 volcano. Once the prior distribution is calculated, the posterior distribution that is  
85 unique to each individual volcano can be calculated. To characterise the behaviour of  
86 a group of volcanoes, or to compare the behaviour of different volcanoes, we  
87 characterise a group of posterior probabilities for different eruption magnitudes ( $m$ )  
88 using a power-law distribution:

89 
$$\Pr(M = m) \sim \gamma^m.$$

90 For Magnitude 4 -7, this becomes with the appropriate normalisation to unit mass:

91 
$$\Pr(M = m) = \frac{\gamma^{m-4}}{1 + \gamma + \gamma^2 + \gamma^3} = \frac{(1-\gamma)\gamma^{m-4}}{1-\gamma^4}.$$

92

93 To fit the power law we use a non-hierarchical version of the Bayesian method  
94 in Bebbington (2014), with the reference distribution for  $\gamma$  is a diffuse log normal  
95 distribution:

$$96 \log(\gamma) \sim N(0, 10^3).$$

97 To perform the statistical analysis we use a Markov Chain Monte Carlo  
98 analysis using RStan<sup>1</sup>.

99  
100 <sup>1</sup>Carpenter, B., et al., 2016, Stan: A probabilistic programming language: Journal of  
101 Statistical Software (in press).

#### 102 103 **(d) Calculation of the recurrence rate of large-magnitude eruptions during the** 104 **Holocene**

105 To estimate the global recurrence rate of eruptions of different magnitude, we  
106 fit a power-law using the assumptions stated in the main text. We solve for the under-  
107 recording parameter  $\lambda$  by using the value of  $\gamma$  from the analysis of the global record  
108 and rearranging the following equations:

109 (1) the proportion of eruptions that are Magnitude 4:

$$110 \theta_4 = \frac{(1-\lambda\gamma)(\lambda\gamma)^0}{1-(\lambda\gamma)^4},$$

111 (2) the proportion of eruptions that are Magnitude 7:

$$112 \theta_7 = \frac{(1-\lambda\gamma)(\lambda\gamma)^3}{1-(\lambda\gamma)^4},$$

113 (3) the expected number of Magnitude 4 events in the Holocene, where  $X_{4:1961}$  is the  
114 number of Magnitude 4 events observed globally at arc volcanoes between 1961 –  
115 2000 (based on 95% confidence that a change point in under-recording occurred after  
116 this date; Furlan, 2010) and normalised to the duration of the Holocene:

117 
$$N_4 = X_{4:1961} \cdot \frac{11,700}{2000-1961};$$

118 (4) the expected number of Magnitude 7 events in the Holocene:

119 
$$N_7 = \frac{N_4}{\theta_4/\theta_7};$$

120 (5) the level of completeness for Magnitude 7 events in the Holocene, which is

121 estimated to be 70% (Brown et al., 2014):

122 
$$\frac{N_7}{x_7} = 0.7.$$

123

124

2017028\_Data Summary and Results.zip
